# Supplementary material
Source: PubMed Central journal article supplement (PMC2084227)
Supplement: biophysj_107.116996_1.pdf [file biophysj_107.116996_1.pdf]

Supplemental Data for:

## Conformation of DNA GG intrastrand cross-link of antitumor oxaliplatin and its enantiomeric analog

Jaroslav Malina\*, Olga Novakova\*, Marie Vojtiskova\*, Giovanni Natile<sup>†</sup>, and Viktor Brabec\*

\*Institute of Biophysics, Academy of Sciences of the Czech Republic, v.v.i., Královopolská 135, CZ-61265 Brno, Czech Republic; and <sup>†</sup>Department of Pharmaceutical Chemistry, University of Bari, I-70125 Bari, Italy

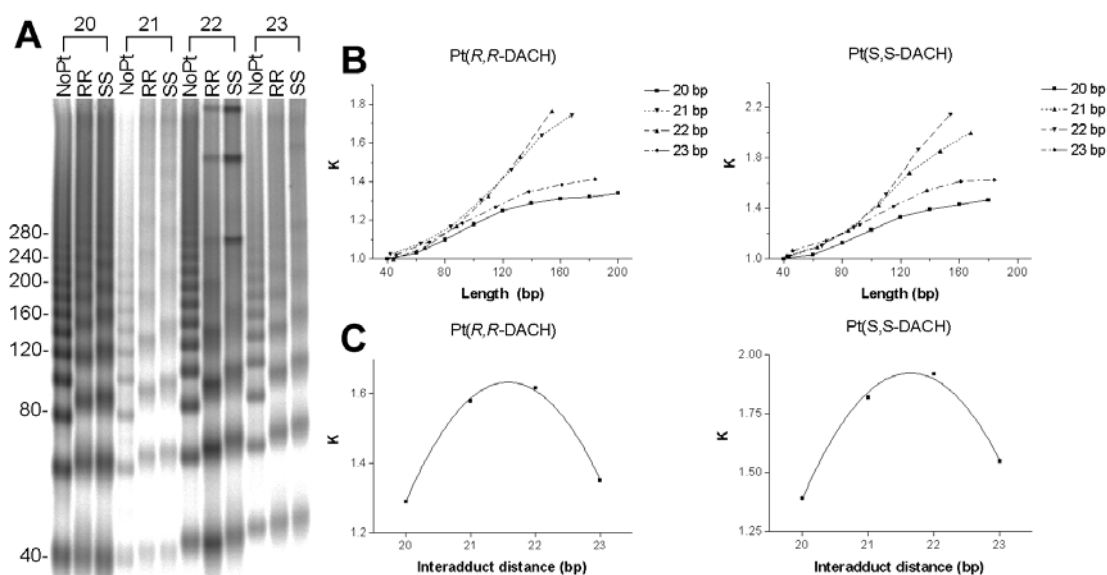

FIGURE S1 The mobility of the ligation products of 20-23 bp duplexes containing single, site-specific 1,2-GG intrastrand CL of [Pt(R,R-DACH)]<sup>2+</sup> or [Pt(S,S-DACH)]<sup>2+</sup> at the central sequence AGGC in an 8% PAA gel. (A) phosphorimage of the ligation products. Lanes: No Pt, unplatinated duplexes; RR, duplex containing the CL of [Pt(R,R-DACH)]<sup>2+</sup>; SS, duplex containing the CL of [Pt(S,S-DACH)]<sup>2+</sup> (B) Plots showing the relative mobility  $K$  versus sequence length curves for the oligomers 20-23 bp long containing the CL of [Pt(R,R-DACH)]<sup>2+</sup> (left) or [Pt(S,S-DACH)]<sup>2+</sup> (right). (■), 20-mer; (▼), 21-mer; (▲), 22-mer; (●), 23-mer. (C) Plots showing the relative mobility  $K$  versus interadduct distance in bp for the oligomers 20-23 bp long containing the CL of [Pt(R,R-DACH)]<sup>2+</sup> (left) or [Pt(S,S-DACH)]<sup>2+</sup> (right) with a total length of 126 bp. The experimental points represent the average of three independent electrophoresis experiments. The curves represent the best fit of these experimental points to the equation  $K = ad^2 + bd + c$  (Bellon, S.F., Coleman, J.H. and Lippard, S.J. (1991) DNA unwinding produced by site-specific intrastrand cross-links of the antitumor drug *cis*-diamminedichloroplatinum(II). *Biochemistry*, **30**, 8026-8035).

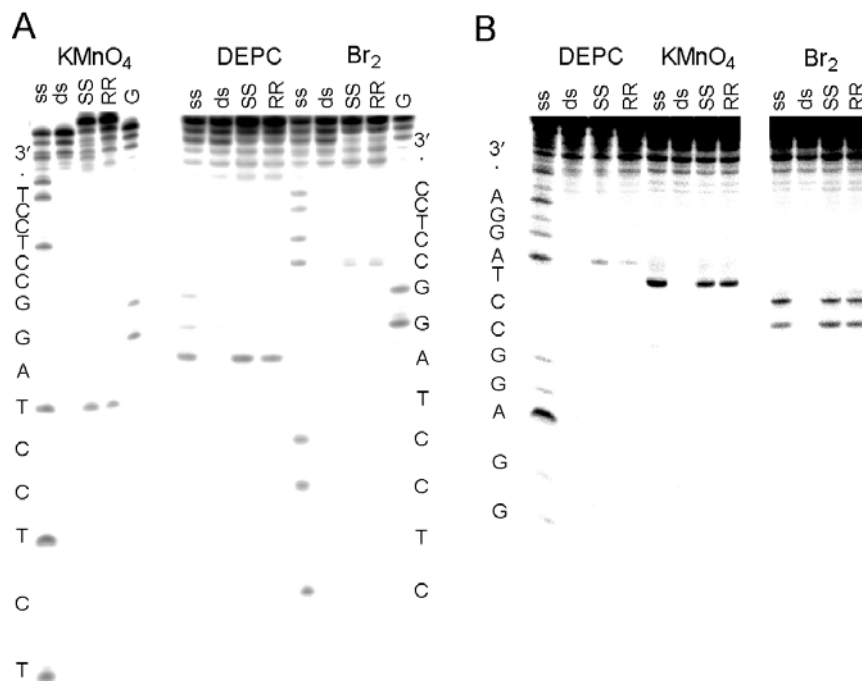

FIGURE S2 Chemical probes of DNA conformation. Piperidine-induced specific strand cleavage at KMnO<sub>4</sub>-modified, KBr/KHSO<sub>5</sub>-modified and DEPC-modified bases in the 23-bp duplex AGGC unplatinated or containing single, 1,2-GG intrastrand cross-link of [Pt(*R,R*-DACH)]<sup>2+</sup> or [Pt(*S,S*-DACH)]<sup>2+</sup>. Lanes: ss, the unplatinated strand; ds, the unplatinated duplex; RR, the duplex containing a unique adduct of [Pt(*R,R*-DACH)]<sup>2+</sup>; SS, the duplex containing a unique adduct of [Pt(*S,S*-DACH)]<sup>2+</sup> G, a Maxam-Gilbert specific reaction for the unplatinated duplex. The oligomers were 5'-end labeled at the top strand (A) or bottom (B) strand.
